# Supplementary material for: Technical Note: Comparison of radiometric techniques for estimating recent organic carbon sequestration rates in freshwater mineral soil wetlands
Source: Copernicus journal article supplement (doi:10.5194/egusphere-2024-1162), 2024-05-28
Supplement: Supplementary file 2 [file egusphere-2024-1162-supplement.zip]

Archive with 2 entries (2 files):
- graphical_abstract.pdf
- Mistry et al - Biogeosci Tech Note - Supplement.pdf
