# Supplementary material for: Technical Note: Comparison of radiometric techniques for estimating recent organic carbon sequestration rates in freshwater mineral soil wetlands
Source: Copernicus journal article supplement (doi:10.5194/egusphere-2024-1162), 2024-05-28
Supplement: Supplementary file 2 [file egusphere-2024-1162-supplement.zip › Mistry et al - Biogeosci Tech Note - Supplement.pdf]

*Supplement to*

**Technical Note: Comparison of radiometric techniques for estimating recent organic carbon sequestration rates in freshwater mineral soil wetlands**

Purbasha Mistry<sup>1</sup>, Irena F. Creed<sup>1,2\*</sup>, Charles G. Trick<sup>3</sup>, Eric Enanga<sup>2</sup>, David A. Lobb<sup>4</sup>

<sup>1</sup> School of Environment and Sustainability, University of Saskatchewan, 117 Science Place, Saskatoon, SK, S7N 5C8, Canada

<sup>2</sup> Department of Physical and Environmental Sciences, University of Toronto, 1265 Military Trail, Toronto, ON, M1C 1A4, Canada

<sup>3</sup> Department of Health and Society, University of Toronto, 1265 Military Trail, Toronto, ON, M1C 1A4, Canada

<sup>4</sup> Department of Soil Science, University of Manitoba, 13 Freedman Crescent, Winnipeg, MB, R3T 2N2, Canada

\*Correspondence to: Irena F. Creed (irena.creed@utoronto.ca)

## Table of contents

|                                                                                                                                                                                                                                                                                                                                                                                                                                                                                                                                                     |    |
|-----------------------------------------------------------------------------------------------------------------------------------------------------------------------------------------------------------------------------------------------------------------------------------------------------------------------------------------------------------------------------------------------------------------------------------------------------------------------------------------------------------------------------------------------------|----|
| <b>Supplementary Figure 1:</b> (a) Study area situated in four provinces of Canada; (b) Alberta (AB) wetland sites; (c) Ontario (ON-B) wetland sites; (d) Saskatchewan (SK-A) wetland sites; (e) Saskatchewan (SK-B) wetland sites; (f) Manitoba (MB) wetland sites; and (g) Ontario (ON-A) wetland sites. Figures (b)-(g) are based on the sampling locations of wetlands used in this study reproduced using Google Earth Images [(b) and (c) ©2024 Airbus; (d), (e), and (g) ©2024 Maxar Technologies; (f) ©2024 Airbus and Maxar Technologies]. | 3  |
| <b>Supplementary Table 1:</b> Summary of physical characteristics of wetlands.                                                                                                                                                                                                                                                                                                                                                                                                                                                                      | 4  |
| <b>Supplementary Table 2:</b> Organic carbon (OC) sequestration rates and their associated classification of 44 sediment cores where both $^{137}\text{Cs}$ and $^{210}\text{Pb}$ profiles were available.                                                                                                                                                                                                                                                                                                                                          | 5  |
| <b>Supplementary Figure 2:</b> Depth distributions of high-quality $^{137}\text{Cs}$ ( $\text{Bq kg}^{-1}$ ) and high-quality $^{210}\text{Pb}$ ( $\text{Bq kg}^{-1}$ ) profiles (along with the organic carbon [OC in %] concentrations and linear plot of log-transformed $^{210}\text{Pb}_{\text{ex}}$ against mass in $\text{g cm}^{-2}$ ) based on their classification. The four depth distribution plots are from sediment cores (a) AB-2 T3, (b) SK-A2 T2, (c) SK-A3 T2, and (d) SK-A3 T3.                                                  | 6  |
| <b>Supplementary Figure 3:</b> Depth distributions of high-quality $^{137}\text{Cs}$ ( $\text{Bq kg}^{-1}$ ) and high-quality $^{210}\text{Pb}$ ( $\text{Bq kg}^{-1}$ ) profiles (along with the organic carbon [OC in %] concentrations and linear plot of log-transformed $^{210}\text{Pb}_{\text{ex}}$ against mass in $\text{g cm}^{-2}$ ) based on their classification. The four depth distribution plots are from sediment cores (a) SK-A4 T2, (b) SK-A5 T1, (c) SK-A5 T3, and (d) SK-A7 T1.                                                 | 7  |
| <b>Supplementary Figure 4:</b> Depth distributions of high-quality $^{137}\text{Cs}$ ( $\text{Bq kg}^{-1}$ ) and high-quality $^{210}\text{Pb}$ ( $\text{Bq kg}^{-1}$ ) profiles (along with the organic carbon [OC in %] concentrations and linear plot of log-transformed $^{210}\text{Pb}_{\text{ex}}$ against mass in $\text{g cm}^{-2}$ ) based on their classification. The four depth distribution plots are from sediment cores (a) SK-A7 T2, (b) SK-A7 T3, (c) SK-B1 T2, and (d) SK-B1 T3.                                                 | 8  |
| <b>Supplementary Figure 5:</b> Depth distributions of high-quality $^{137}\text{Cs}$ ( $\text{Bq kg}^{-1}$ ) and high-quality $^{210}\text{Pb}$ ( $\text{Bq kg}^{-1}$ ) profiles (along with the organic carbon [OC in %] concentrations and linear plot of log-transformed $^{210}\text{Pb}_{\text{ex}}$ against mass in $\text{g cm}^{-2}$ ) based on their classification. The four depth distribution plots are from sediment cores (a) SK-B2 T2, (b) SK-B4 T1, (c) SK-B4 T2, and (d) SK-B4 T3.                                                 | 9  |
| <b>Supplementary Figure 6:</b> Depth distributions of high-quality $^{137}\text{Cs}$ ( $\text{Bq kg}^{-1}$ ) and high-quality $^{210}\text{Pb}$ ( $\text{Bq kg}^{-1}$ ) profiles (along with the organic carbon [OC in %] concentrations and linear plot of log-transformed $^{210}\text{Pb}_{\text{ex}}$ against mass in $\text{g cm}^{-2}$ ) based on their classification. The four depth distribution plots are from sediment cores (a) SK-B5 T1, (b) SK-B5 T3, (c) SK-B9 T2, and (d) SK-B9 T3.                                                 | 10 |
| <b>Supplementary Figure 7:</b> Depth distributions of high-quality $^{137}\text{Cs}$ ( $\text{Bq kg}^{-1}$ ) and high-quality $^{210}\text{Pb}$ ( $\text{Bq kg}^{-1}$ ) profiles (along with the organic carbon [OC in %] concentrations and linear plot of log-transformed $^{210}\text{Pb}_{\text{ex}}$ against mass in $\text{g cm}^{-2}$ ) based on their classification. The four depth distribution plots are from sediment cores (a) MB-1 T1, (b) MB-1 T2, (c) MB-1 T3, and (d) MB-2 T1.                                                     | 11 |
| <b>Supplementary Figure 8:</b> Depth distributions of high-quality $^{137}\text{Cs}$ ( $\text{Bq kg}^{-1}$ ) and high-quality $^{210}\text{Pb}$ ( $\text{Bq kg}^{-1}$ ) profiles (along with the organic carbon [OC in %] concentrations and linear plot of log-transformed $^{210}\text{Pb}_{\text{ex}}$ against mass in $\text{g cm}^{-2}$ ) based on their classification. The four depth distribution plots are from sediment cores (a) MB-4 T1, (b) MB-4 T2, (c) ON-A1 T2, and (d) ON-A1 T3.                                                   | 12 |

|                                                                                                                                                                                                                                                                                                                                                                                                                                                                                                     |    |
|-----------------------------------------------------------------------------------------------------------------------------------------------------------------------------------------------------------------------------------------------------------------------------------------------------------------------------------------------------------------------------------------------------------------------------------------------------------------------------------------------------|----|
| <b>Supplementary Figure 9:</b> Depth distributions of high-quality $^{137}\text{Cs}$ ( $\text{Bq kg}^{-1}$ ) and high-quality $^{210}\text{Pb}$ ( $\text{Bq kg}^{-1}$ ) profiles (along with the organic carbon [OC in %] concentrations and linear plot of log-transformed $^{210}\text{Pb}_{\text{ex}}$ against mass in $\text{g cm}^{-2}$ ) based on their classification. The depth distribution plot is from sediment core ON-B2 T3.                                                           | 13 |
| <b>Supplementary Figure 10:</b> Depth distributions of high-quality $^{137}\text{Cs}$ ( $\text{Bq kg}^{-1}$ ) and low-quality $^{210}\text{Pb}$ ( $\text{Bq kg}^{-1}$ ) profiles (along with the organic carbon [OC in %] concentrations and linear plot of log-transformed $^{210}\text{Pb}_{\text{ex}}$ against mass in $\text{g cm}^{-2}$ ) based on their classification. The four depth distribution plots are from sediment cores (a) SK-B2 T3, (b) MB-3 T2, (c) MB-5 T1, and (d) MB-5 T3.    | 14 |
| <b>Supplementary Figure 11:</b> Depth distributions of high-quality $^{137}\text{Cs}$ ( $\text{Bq kg}^{-1}$ ) and low-quality $^{210}\text{Pb}$ ( $\text{Bq kg}^{-1}$ ) profiles (along with the organic carbon [OC in %] concentrations and linear plot of log-transformed $^{210}\text{Pb}_{\text{ex}}$ against mass in $\text{g cm}^{-2}$ ) based on their classification. The depth distribution plot is from sediment core ON-B1 T3.                                                           | 15 |
| <b>Supplementary Figure 12:</b> Depth distributions of low-quality $^{137}\text{Cs}$ ( $\text{Bq kg}^{-1}$ ) and high-quality $^{210}\text{Pb}$ ( $\text{Bq kg}^{-1}$ ) profiles (along with the organic carbon [OC in %] concentrations and linear plot of log-transformed $^{210}\text{Pb}_{\text{ex}}$ against mass in $\text{g cm}^{-2}$ ) based on their classification. The four depth distribution plots are from sediment cores (a) ON-A2 T2, (b) ON-A2 T3, (c) ON-A2 T3, and (d) ON-B1 T1. | 16 |
| <b>Supplementary Figure 13:</b> Depth distributions of low-quality $^{137}\text{Cs}$ ( $\text{Bq kg}^{-1}$ ) and high-quality $^{210}\text{Pb}$ ( $\text{Bq kg}^{-1}$ ) profiles (along with the organic carbon [OC in %] concentrations and linear plot of log-transformed $^{210}\text{Pb}_{\text{ex}}$ against mass in $\text{g cm}^{-2}$ ) based on their classification. The two depth distribution plots are from sediment cores (a) ON-B1 T2 and (b) ON-B3 T1.                               | 17 |

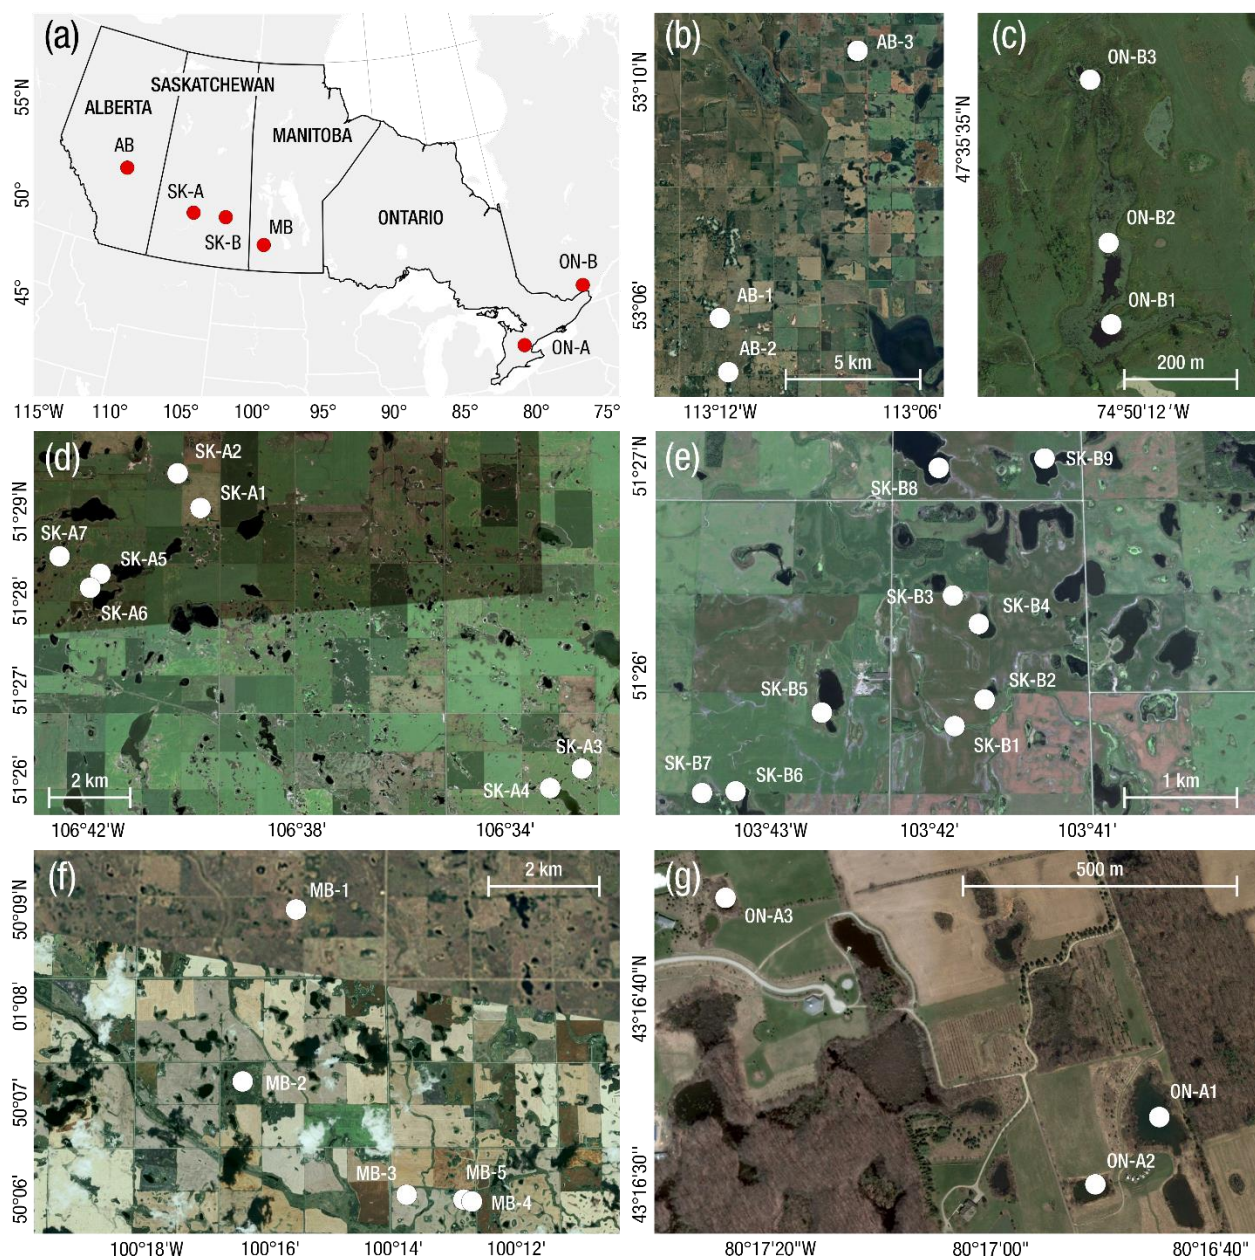

**Supplementary Figure 1:** (a) Study area situated in four provinces of Canada; (b) Alberta (AB) wetland sites; (c) Ontario (ON-B) wetland sites; (d) Saskatchewan (SK-A) wetland sites; (e) Saskatchewan (SK-B) wetland sites; (f) Manitoba (MB) wetland sites; and (g) Ontario (ON-A) wetland sites. Figures (b)-(g) are based on the sampling locations of wetlands used in this study reproduced using Google Earth Images [(b) and (c) ©2024 Airbus; (d), (e), and (g) ©2024 Maxar Technologies; (f) ©2024 Airbus and Maxar Technologies].

**Supplementary Table 1:** Summary of physical characteristics of wetlands.

| Category                                                     | Alberta                       | Saskatchewan                          |                    | Manitoba           | Ontario               |                    |
|--------------------------------------------------------------|-------------------------------|---------------------------------------|--------------------|--------------------|-----------------------|--------------------|
| Province id                                                  | AB                            | SK-A                                  | SK-B               | MB                 | ON-A                  | ON-B               |
| Number of wetlands                                           | 3                             | 7                                     | 9                  | 5                  | 3                     | 3                  |
| Latitude and longitude                                       | 52°- 53° and<br>111°- 113°    | 51° and 106°                          | 51° and 103°       | 50° and 100°       | 43.3° and<br>80.3°    | 45.6° and<br>74.8° |
| Sampling year                                                | 2016                          | 2019                                  | 2019               | 2019               | 2018                  | 2019               |
| Mean temperature of the<br>growing season (°C)               | 11                            | 12.1                                  | 11.7               | 12.4               | 14.3                  | 13.8               |
| Mean total annual<br>precipitation of the water<br>year (mm) | 439                           | 360                                   | 458                | 464                | 892                   | 997                |
| Hardiness zone                                               | 3b                            | 3b                                    | 3a                 | 3a                 | 5b                    | 5a                 |
| Proportion of hardiness                                      | 1                             | 1                                     | 1                  | 0.7                | 0.7                   | 1                  |
| Soil great group                                             | Black<br>Chernozem            | Dark Brown<br>Chernozem               | Black<br>Chernozem | Black<br>Chernozem | Grey Brown<br>Luvisol | Humic<br>Gleysol   |
| Soil texture                                                 | Fine                          | Medium                                | Medium             | Fine               | Coarse                | Fine               |
| Local surface form                                           | Hummocky<br>and<br>undulating | Hummock,<br>undulating,<br>and ridged | Hummocky           | Hummocky           | Hummocky              | Level              |
| Regional slope (%)                                           | 0-9                           | 0-9                                   | 4-9                | 4-9                | 10-15                 | 0-3                |
| Drainage class                                               | Well drained                  | Well drained                          | Well drained       | Well drained       | Well drained          | Poorly<br>drained  |

**Supplementary Table 2:** Organic carbon (OC) sequestration rates based on  $^{137}\text{Cs}$  and  $^{210}\text{Pb}$  dating and their associated classification of 44 sediment cores (where both  $^{137}\text{Cs}$  and  $^{210}\text{Pb}$  profiles were available).

| Wetland id | Classification of $^{137}\text{Cs}$ | Classification of $^{210}\text{Pb}$ | OC sequestration rate since 1954, $^{137}\text{Cs}$ ( $\text{Mg ha}^{-1} \text{yr}^{-1}$ ) | OC sequestration rate since 1963, $^{137}\text{Cs}$ ( $\text{Mg ha}^{-1} \text{yr}^{-1}$ ) | OC sequestration rate since 1954, $^{210}\text{Pb}$ ( $\text{Mg ha}^{-1} \text{yr}^{-1}$ ) | OC sequestration rate since 1963, $^{210}\text{Pb}$ ( $\text{Mg ha}^{-1} \text{yr}^{-1}$ ) |
|------------|-------------------------------------|-------------------------------------|--------------------------------------------------------------------------------------------|--------------------------------------------------------------------------------------------|--------------------------------------------------------------------------------------------|--------------------------------------------------------------------------------------------|
| AB-2 T3    | High-quality                        | High-quality                        | 1.04                                                                                       | 0.62                                                                                       | 0.80                                                                                       | 0.78                                                                                       |
| SK-A1 T3   | Low-quality                         | High-quality                        | 0.32                                                                                       | 0.27                                                                                       | 0.31                                                                                       | 0.33                                                                                       |
| SK-A2 T2   | High-quality                        | High-quality                        | 1.62                                                                                       | 1.38                                                                                       | 0.47                                                                                       | 0.49                                                                                       |
| SK-A3 T1   | High-quality                        | High-quality                        | 0.64                                                                                       | 0.37                                                                                       | 0.37                                                                                       | 0.40                                                                                       |
| SK-A3 T2   | High-quality                        | High-quality                        | 0.56                                                                                       | 0.37                                                                                       | 0.45                                                                                       | 0.50                                                                                       |
| SK-A3 T3   | High-quality                        | High-quality                        | 0.47                                                                                       | 0.34                                                                                       | 0.40                                                                                       | 0.43                                                                                       |
| SK-A4 T2   | High-quality                        | High-quality                        | 0.93                                                                                       | 0.84                                                                                       | 0.35                                                                                       | 0.36                                                                                       |
| SK-A5 T1   | High-quality                        | High-quality                        | 0.84                                                                                       | 0.68                                                                                       | 0.80                                                                                       | 0.83                                                                                       |
| SK-A5 T3   | High-quality                        | High-quality                        | 1.00                                                                                       | 0.75                                                                                       | 0.68                                                                                       | 0.70                                                                                       |
| SK-A6 T1   | Low-quality                         | Low-quality                         | 0.11                                                                                       | 0.05                                                                                       | 0.69                                                                                       | 0.73                                                                                       |
| SK-A7 T1   | High-quality                        | High-quality                        | 0.86                                                                                       | 0.55                                                                                       | 0.53                                                                                       | 0.56                                                                                       |
| SK-A7 T2   | High-quality                        | High-quality                        | 0.57                                                                                       | 0.30                                                                                       | 0.41                                                                                       | 0.43                                                                                       |
| SK-A7 T3   | High-quality                        | High-quality                        | 0.69                                                                                       | 0.60                                                                                       | 0.54                                                                                       | 0.56                                                                                       |
| SK-B1 T2   | High-quality                        | High-quality                        | 1.01                                                                                       | 0.83                                                                                       | 0.81                                                                                       | 0.81                                                                                       |
| SK-B1 T3   | High-quality                        | High-quality                        | 0.88                                                                                       | 0.83                                                                                       | 0.77                                                                                       | 0.77                                                                                       |
| SK-B2 T2   | High-quality                        | High-quality                        | 0.58                                                                                       | 0.34                                                                                       | 0.34                                                                                       | 0.34                                                                                       |
| SK-B2 T3   | High-quality                        | Low-quality                         | 0.44                                                                                       | 0.37                                                                                       | 0.60                                                                                       | 0.63                                                                                       |
| SK-B4 T1   | High-quality                        | High-quality                        | 1.70                                                                                       | 1.57                                                                                       | 1.41                                                                                       | 1.36                                                                                       |
| SK-B4 T2   | High-quality                        | High-quality                        | 1.31                                                                                       | 1.14                                                                                       | 0.69                                                                                       | 0.71                                                                                       |
| SK-B4 T3   | High-quality                        | High-quality                        | 1.04                                                                                       | 1.03                                                                                       | 0.95                                                                                       | 0.95                                                                                       |
| SK-B5 T1   | High-quality                        | High-quality                        | 1.25                                                                                       | 0.65                                                                                       | 1.04                                                                                       | 1.04                                                                                       |
| SK-B5 T3   | High-quality                        | High-quality                        | 1.16                                                                                       | 0.76                                                                                       | 0.71                                                                                       | 0.71                                                                                       |
| SK-B9 T2   | High-quality                        | High-quality                        | 0.67                                                                                       | 0.50                                                                                       | 0.59                                                                                       | 0.60                                                                                       |
| SK-B9 T3   | High-quality                        | High-quality                        | 1.18                                                                                       | 0.38                                                                                       | 0.46                                                                                       | 0.46                                                                                       |
| MB-1 T1    | High-quality                        | High-quality                        | 1.60                                                                                       | 0.39                                                                                       | 0.51                                                                                       | 0.53                                                                                       |
| MB-1 T2    | High-quality                        | High-quality                        | 1.11                                                                                       | 0.91                                                                                       | 0.97                                                                                       | 1.01                                                                                       |
| MB-1 T3    | High-quality                        | High-quality                        | 0.99                                                                                       | 0.50                                                                                       | 0.60                                                                                       | 0.63                                                                                       |
| MB-2 T1    | High-quality                        | High-quality                        | 0.98                                                                                       | 0.12                                                                                       | 1.08                                                                                       | 1.15                                                                                       |
| MB-3 T2    | High-quality                        | Low-quality                         | 1.16                                                                                       | 0.55                                                                                       | 0.50                                                                                       | 0.52                                                                                       |
| MB-4 T1    | High-quality                        | High-quality                        | 0.44                                                                                       | 0.21                                                                                       | 0.34                                                                                       | 0.36                                                                                       |
| MB-4 T2    | High-quality                        | High-quality                        | 0.65                                                                                       | 0.45                                                                                       | 0.43                                                                                       | 0.46                                                                                       |
| MB-4 T3    | High-quality                        | Low-quality                         | 0.78                                                                                       | 0.06                                                                                       | 0.81                                                                                       | 0.86                                                                                       |
| MB-5 T1    | High-quality                        | Low-quality                         | 1.03                                                                                       | 0.26                                                                                       | 0.38                                                                                       | 0.39                                                                                       |
| MB-5 T3    | High-quality                        | Low-quality                         | 1.66                                                                                       | 1.55                                                                                       | 1.80                                                                                       | 1.93                                                                                       |
| ON-A1 T2   | High-quality                        | High-quality                        | 1.22                                                                                       | 0.48                                                                                       | 0.74                                                                                       | 0.74                                                                                       |
| ON-A1 T3   | High-quality                        | High-quality                        | 1.05                                                                                       | 0.21                                                                                       | 1.03                                                                                       | 1.04                                                                                       |
| ON-A2 T1   | Low-quality                         | High-quality                        | 0.53                                                                                       | 0.21                                                                                       | 0.42                                                                                       | 0.40                                                                                       |
| ON-A2 T2   | Low-quality                         | High-quality                        | 0.26                                                                                       | 0.19                                                                                       | 0.33                                                                                       | 0.36                                                                                       |
| ON-A2 T3   | Low-quality                         | High-quality                        | 0.62                                                                                       | 0.37                                                                                       | 0.55                                                                                       | 0.54                                                                                       |
| ON-B1 T1   | Low-quality                         | High-quality                        | 0.60                                                                                       | 0.10                                                                                       | 0.80                                                                                       | 0.87                                                                                       |
| ON-B1 T2   | Low-quality                         | High-quality                        | 1.14                                                                                       | 0.05                                                                                       | 0.79                                                                                       | 0.74                                                                                       |
| ON-B1 T3   | High-quality                        | Low-quality                         | 2.31                                                                                       | 1.58                                                                                       | 0.73                                                                                       | 0.75                                                                                       |
| ON-B2 T3   | High-quality                        | High-quality                        | 2.60                                                                                       | 0.76                                                                                       | 0.76                                                                                       | 0.76                                                                                       |
| ON-B3 T1   | Low-quality                         | High-quality                        | 1.15                                                                                       | 0.12                                                                                       | 0.23                                                                                       | 0.23                                                                                       |

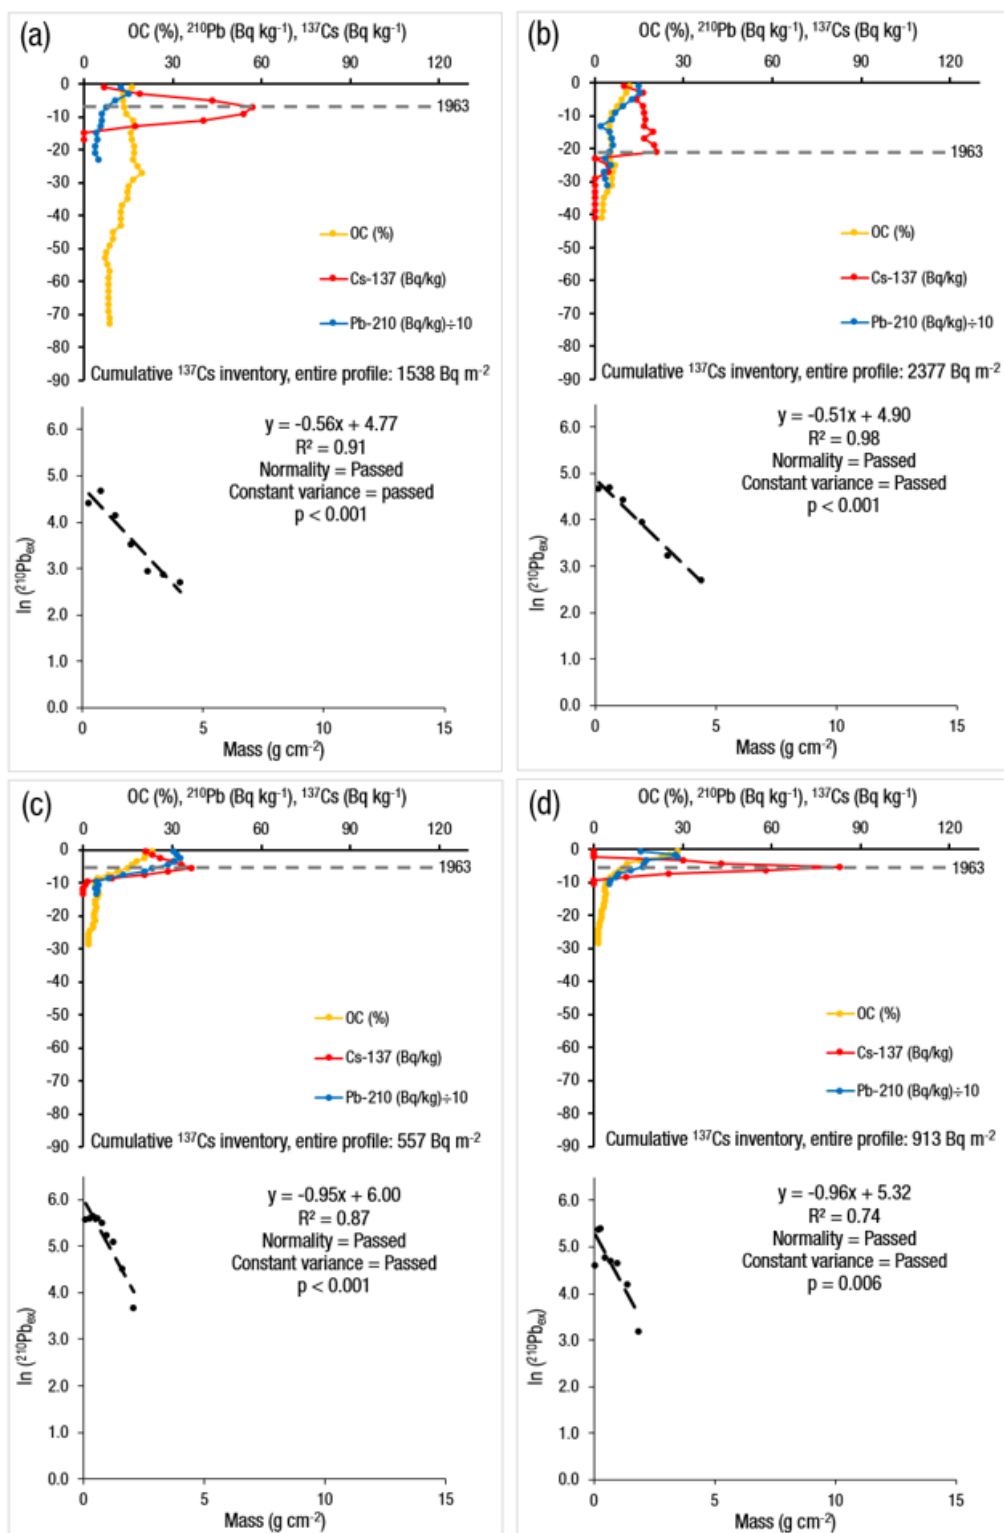

**Supplementary Figure 2:** Depth distributions of high-quality  $^{137}\text{Cs}$  (Bq kg $^{-1}$ ) and high-quality  $^{210}\text{Pb}$  (Bq kg $^{-1}$ ) profiles (along with the organic carbon [OC in %] concentrations and linear plot of log-transformed  $^{210}\text{Pb}_{\text{ex}}$  against mass in g cm $^{-2}$ ) based on their classification. The four depth distribution plots are from sediment cores (a) AB-2 T3, (b) SK-A2 T2, (c) SK-A3 T2, and (d) SK-A3 T3.

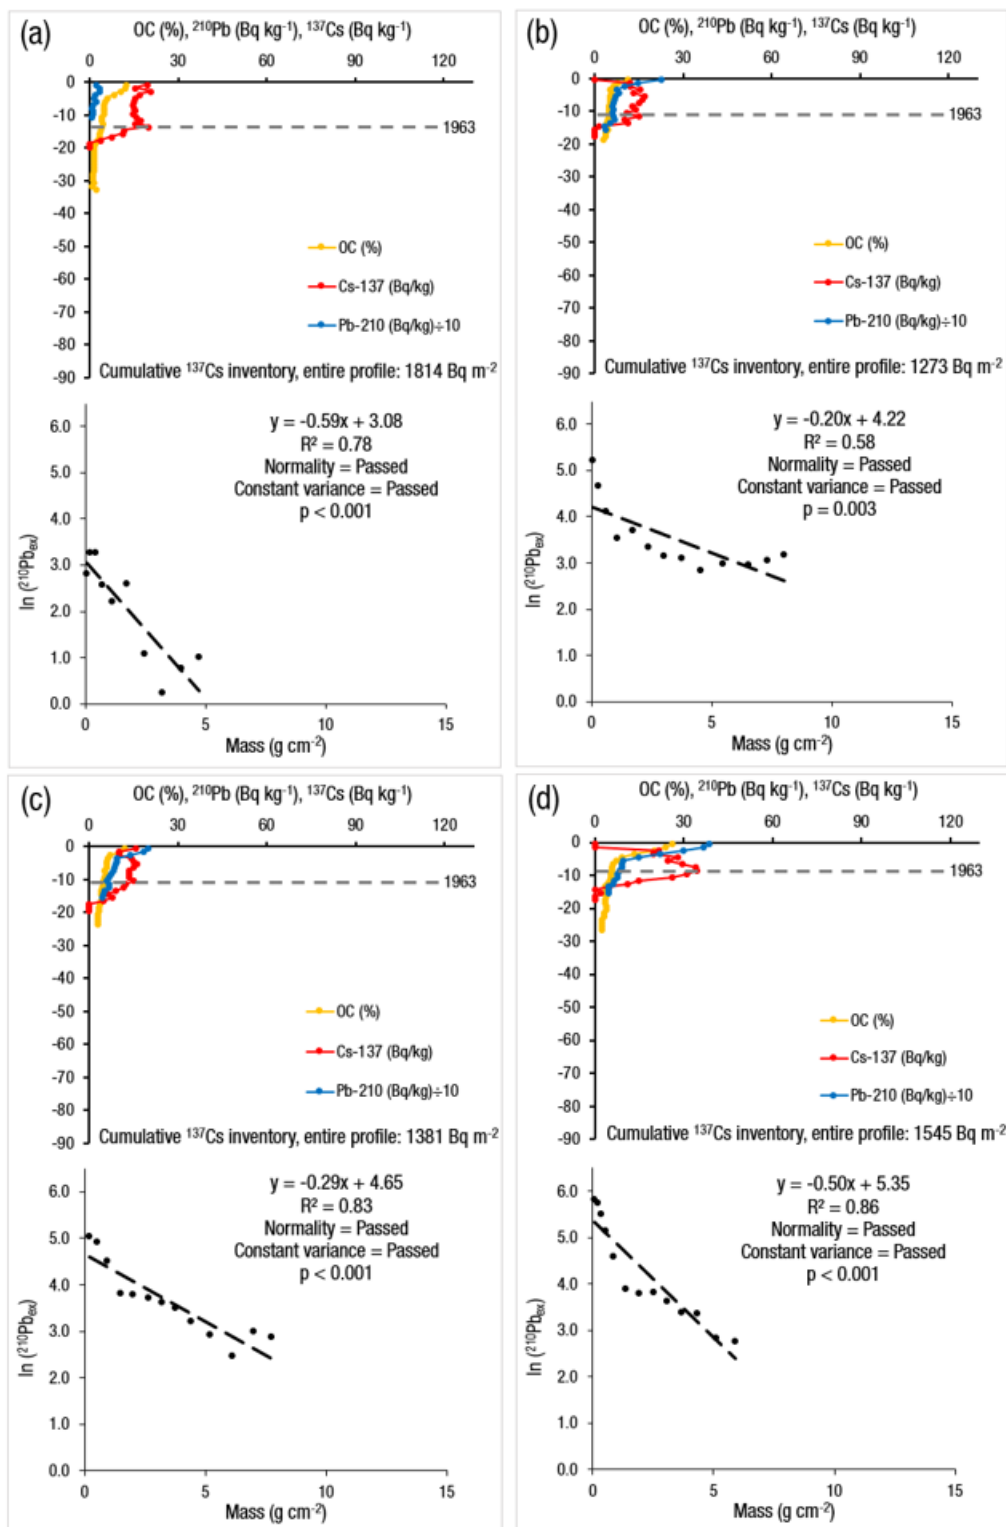

**Supplementary Figure 3:** Depth distributions of high-quality  $^{137}\text{Cs}$  ( $\text{Bq kg}^{-1}$ ) and high-quality  $^{210}\text{Pb}$  ( $\text{Bq kg}^{-1}$ ) profiles (along with the organic carbon [OC in %] concentrations and linear plot of log-transformed  $^{210}\text{Pb}_{\text{ex}}$  against mass in  $\text{g cm}^{-2}$ ) based on their classification. The four depth distribution plots are from sediment cores (a) SK-A4 T2, (b) SK-A5 T1, (c) SK-A5 T3, and (d) SK-A7 T1.

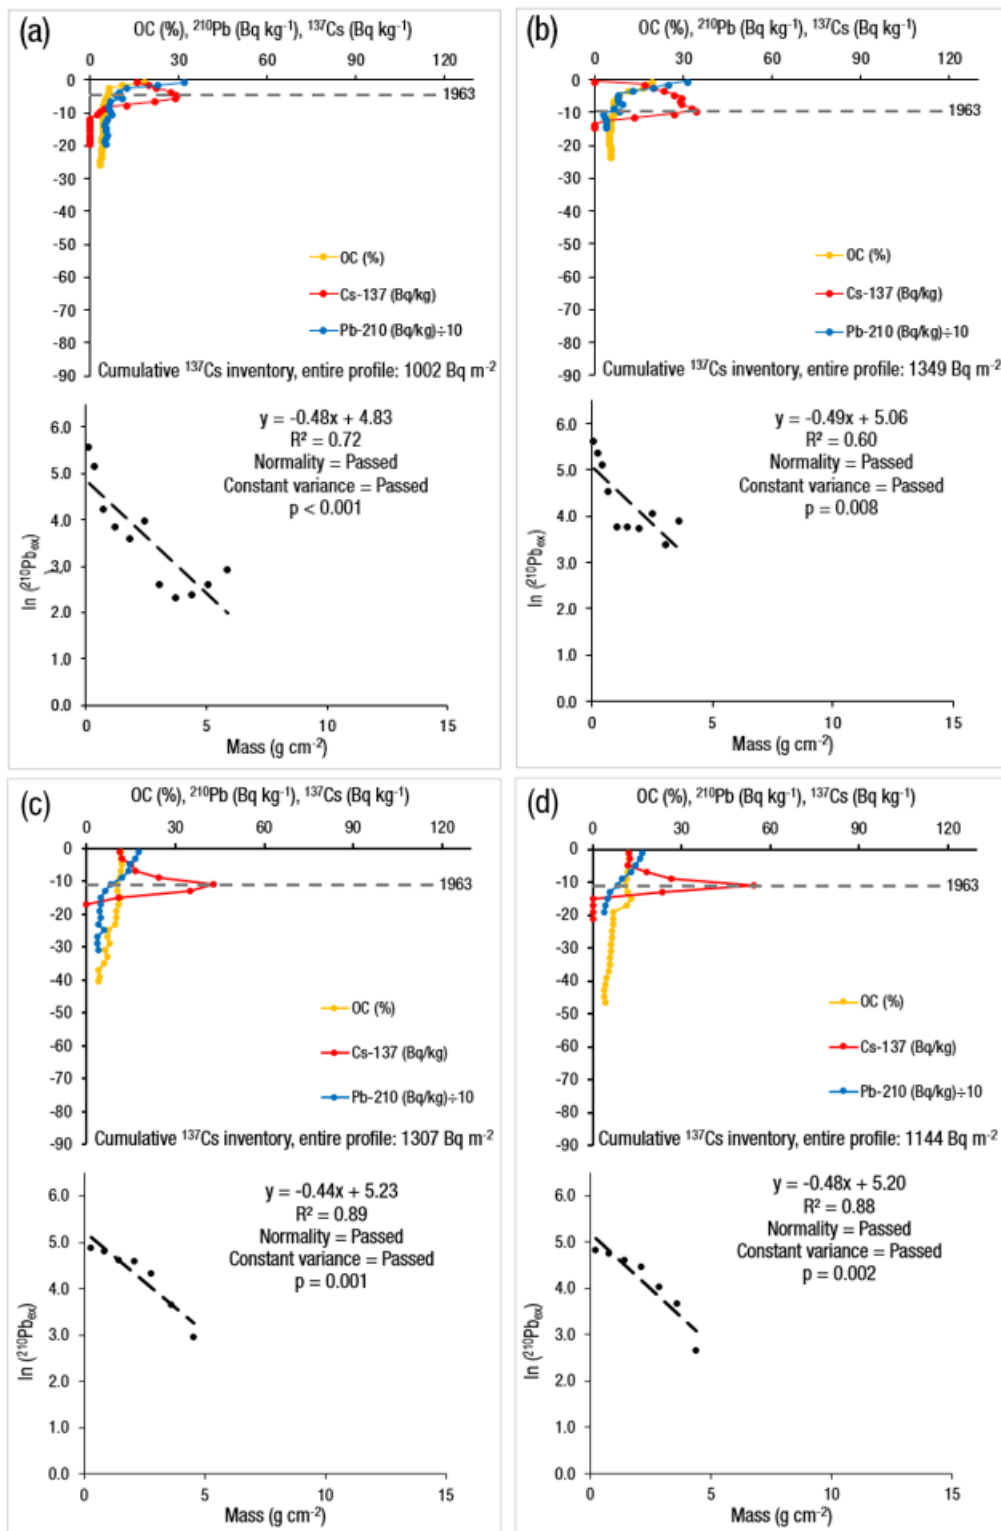

**Supplementary Figure 4:** Depth distributions of high-quality  $^{137}\text{Cs}$  (Bq kg $^{-1}$ ) and high-quality  $^{210}\text{Pb}$  (Bq kg $^{-1}$ ) profiles (along with the organic carbon [OC in %] concentrations and linear plot of log-transformed  $^{210}\text{Pb}_{\text{ex}}$  against mass in g cm $^{-2}$ ) based on their classification. The four depth distribution plots are from sediment cores (a) SK-A7 T2, (b) SK-A7 T3, (c) SK-B1 T2, and (d) SK-B1 T3.

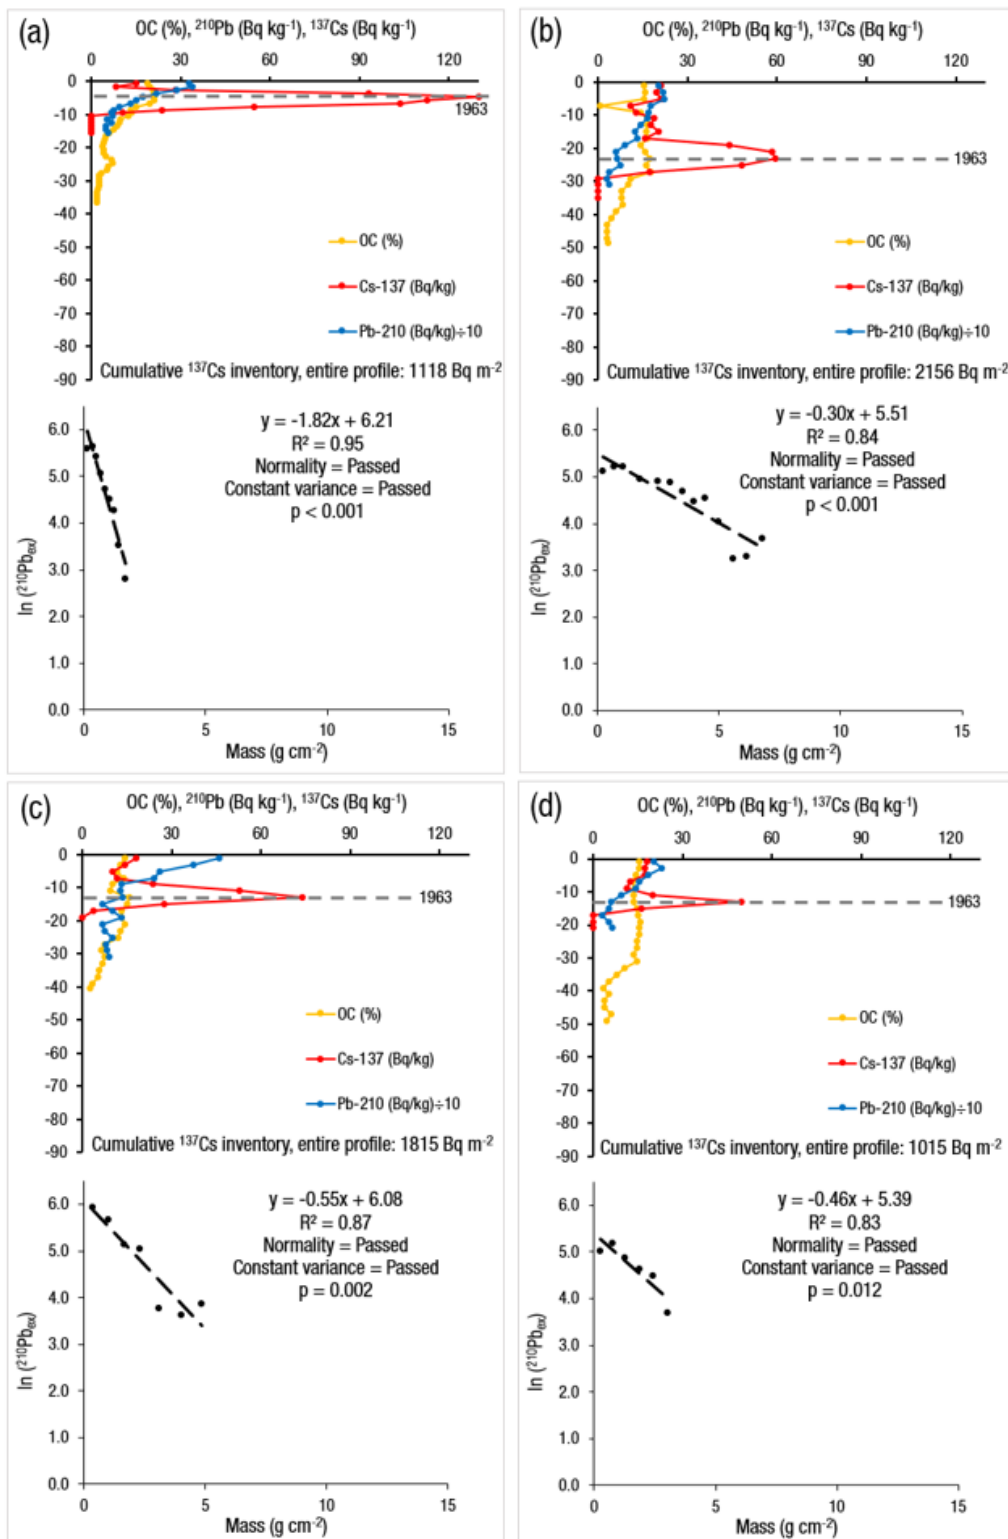

**Supplementary Figure 5:** Depth distributions of high-quality  $^{137}\text{Cs}$  (Bq kg $^{-1}$ ) and high-quality  $^{210}\text{Pb}$  (Bq kg $^{-1}$ ) profiles (along with the organic carbon [OC in %] concentrations and linear plot of log-transformed  $^{210}\text{Pb}_{\text{ex}}$  against mass in g cm $^{-2}$ ) based on their classification. The four depth distribution plots are from sediment cores (a) SK-B2 T2, (b) SK-B4 T1, (c) SK-B4 T2, and (d) SK-B4 T3.

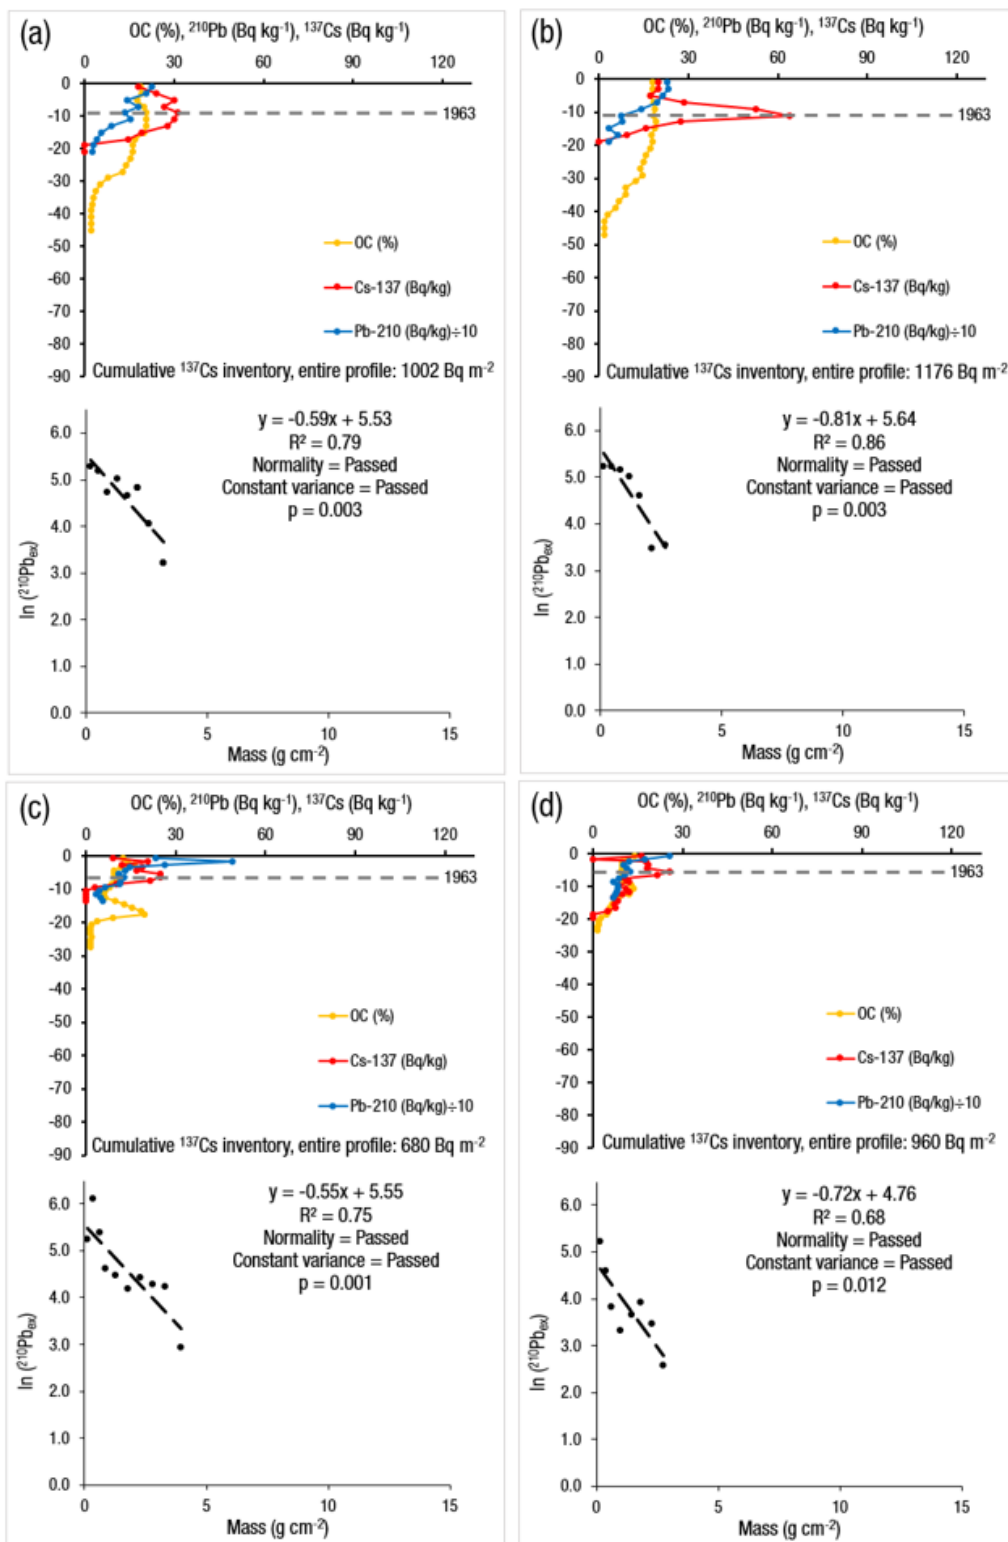

**Supplementary Figure 6:** Depth distributions of high-quality  $^{137}\text{Cs}$  ( $\text{Bq kg}^{-1}$ ) and high-quality  $^{210}\text{Pb}$  ( $\text{Bq kg}^{-1}$ ) profiles (along with the organic carbon [OC in %] concentrations and linear plot of log-transformed  $^{210}\text{Pb}_{\text{ex}}$  against mass in  $\text{g cm}^{-2}$ ) based on their classification. The four depth distribution plots are from sediment cores (a) SK-B5 T1, (b) SK-B5 T3, (c) SK-B9 T2, and (d) SK-B9 T3.

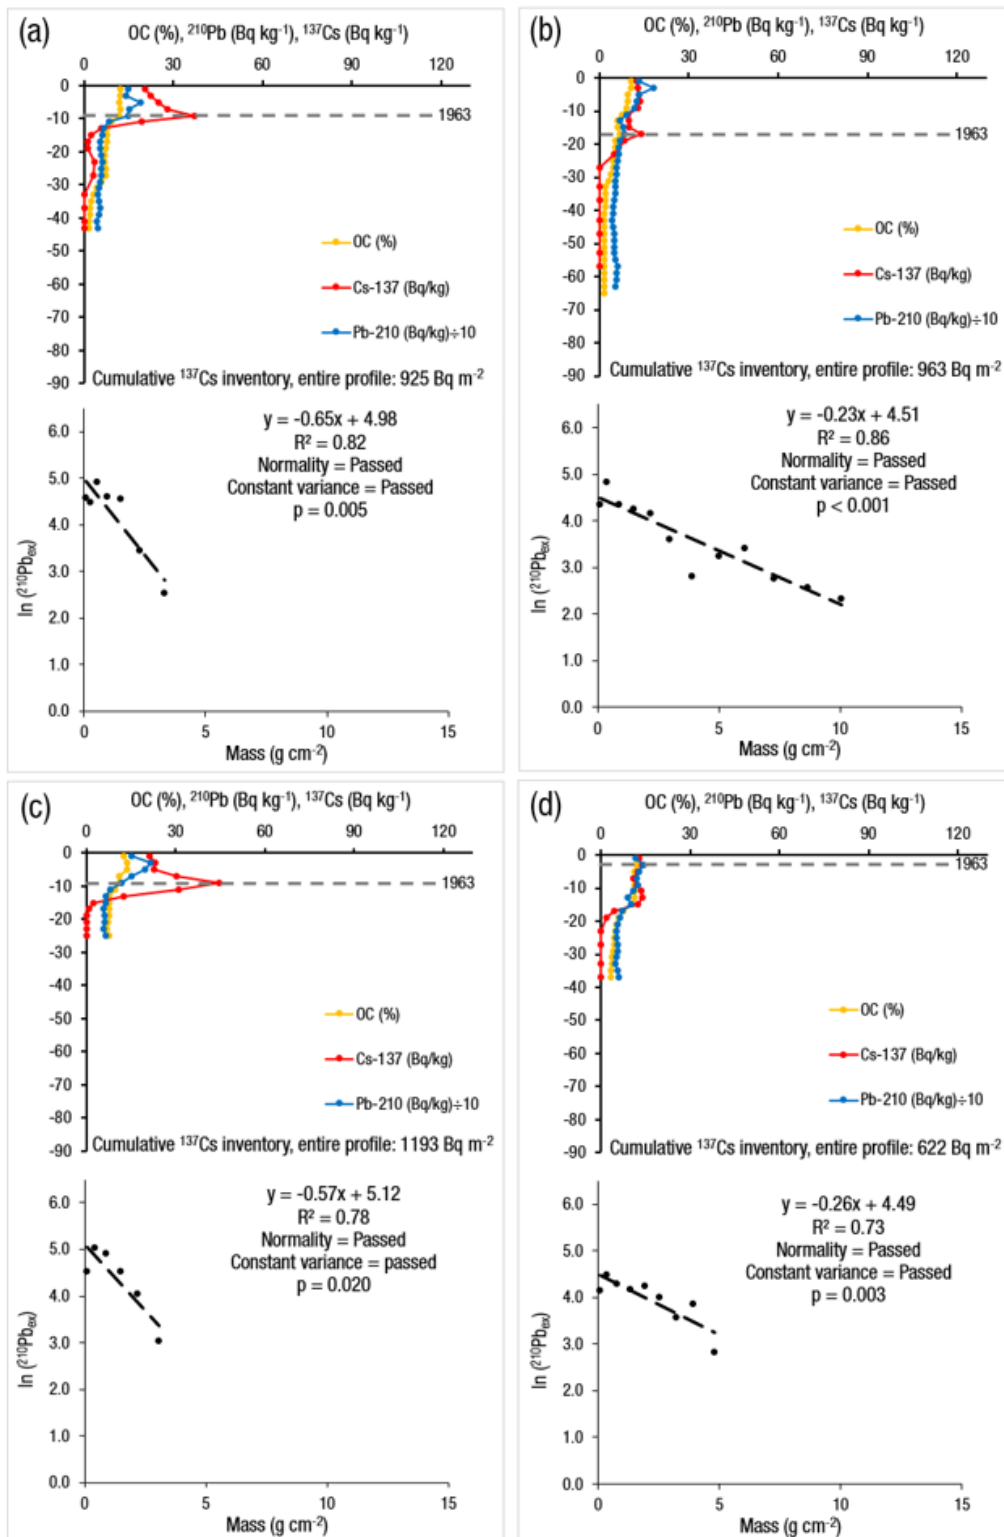

**Supplementary Figure 7:** Depth distributions of high-quality  $^{137}\text{Cs}$  (Bq kg $^{-1}$ ) and high-quality  $^{210}\text{Pb}$  (Bq kg $^{-1}$ ) profiles (along with the organic carbon [OC in %] concentrations and linear plot of log-transformed  $^{210}\text{Pb}_{\text{ex}}$  against mass in g cm $^{-2}$ ) based on their classification. The four depth distribution plots are from sediment cores (a) MB-1 T1, (b) MB-1 T2, (c) MB-1 T3, and (d) MB-2 T1.

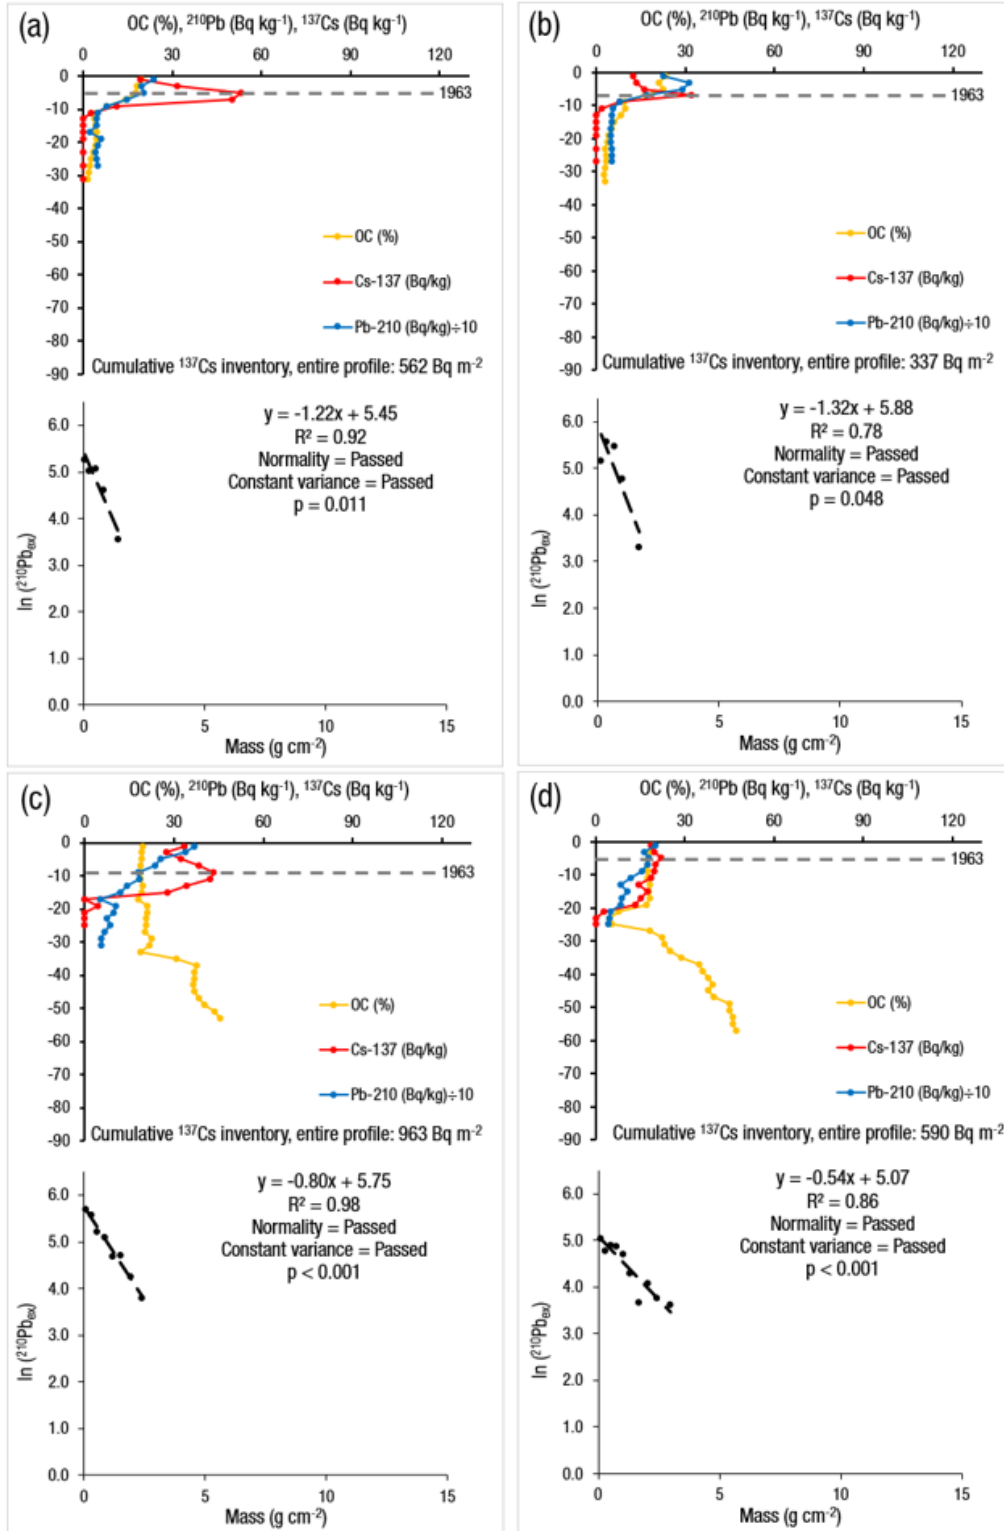

**Supplementary Figure 8:** Depth distributions of high-quality  $^{137}\text{Cs}$  ( $\text{Bq kg}^{-1}$ ) and high-quality  $^{210}\text{Pb}$  ( $\text{Bq kg}^{-1}$ ) profiles (along with the organic carbon [OC in %] concentrations and linear plot of log-transformed  $^{210}\text{Pb}_{\text{ex}}$  against mass in  $\text{g cm}^{-2}$ ) based on their classification. The four depth distribution plots are from sediment cores (a) MB-4 T1, (b) MB-4 T2, (c) ON-A1 T2, and (d) ON-A1 T3.

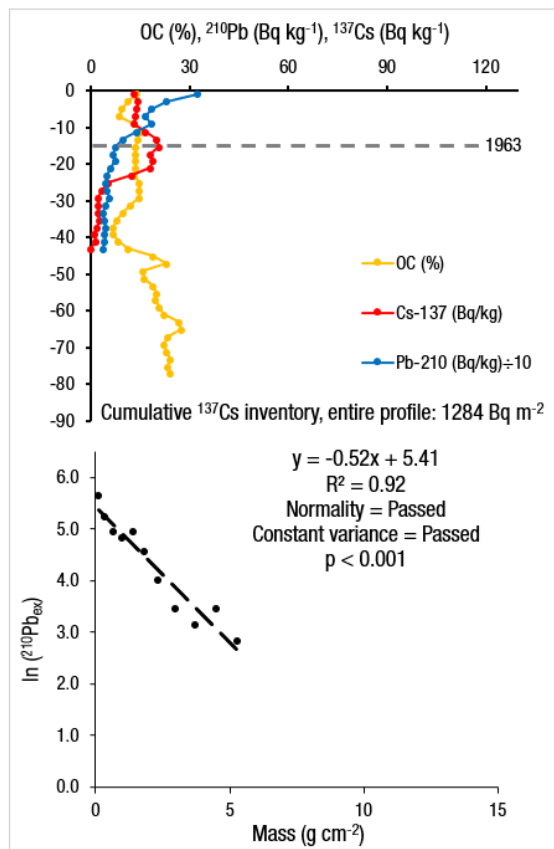

**Supplementary Figure 9:** Depth distributions of high-quality  $^{137}\text{Cs}$  (Bq kg $^{-1}$ ) and high-quality  $^{210}\text{Pb}$  (Bq kg $^{-1}$ ) profiles (along with the organic carbon [OC in %] concentrations and linear plot of log-transformed  $^{210}\text{Pb}_{\text{ex}}$  against mass in g cm $^{-2}$ ) based on their classification. The depth distribution plot is from sediment core ON-B2 T3.

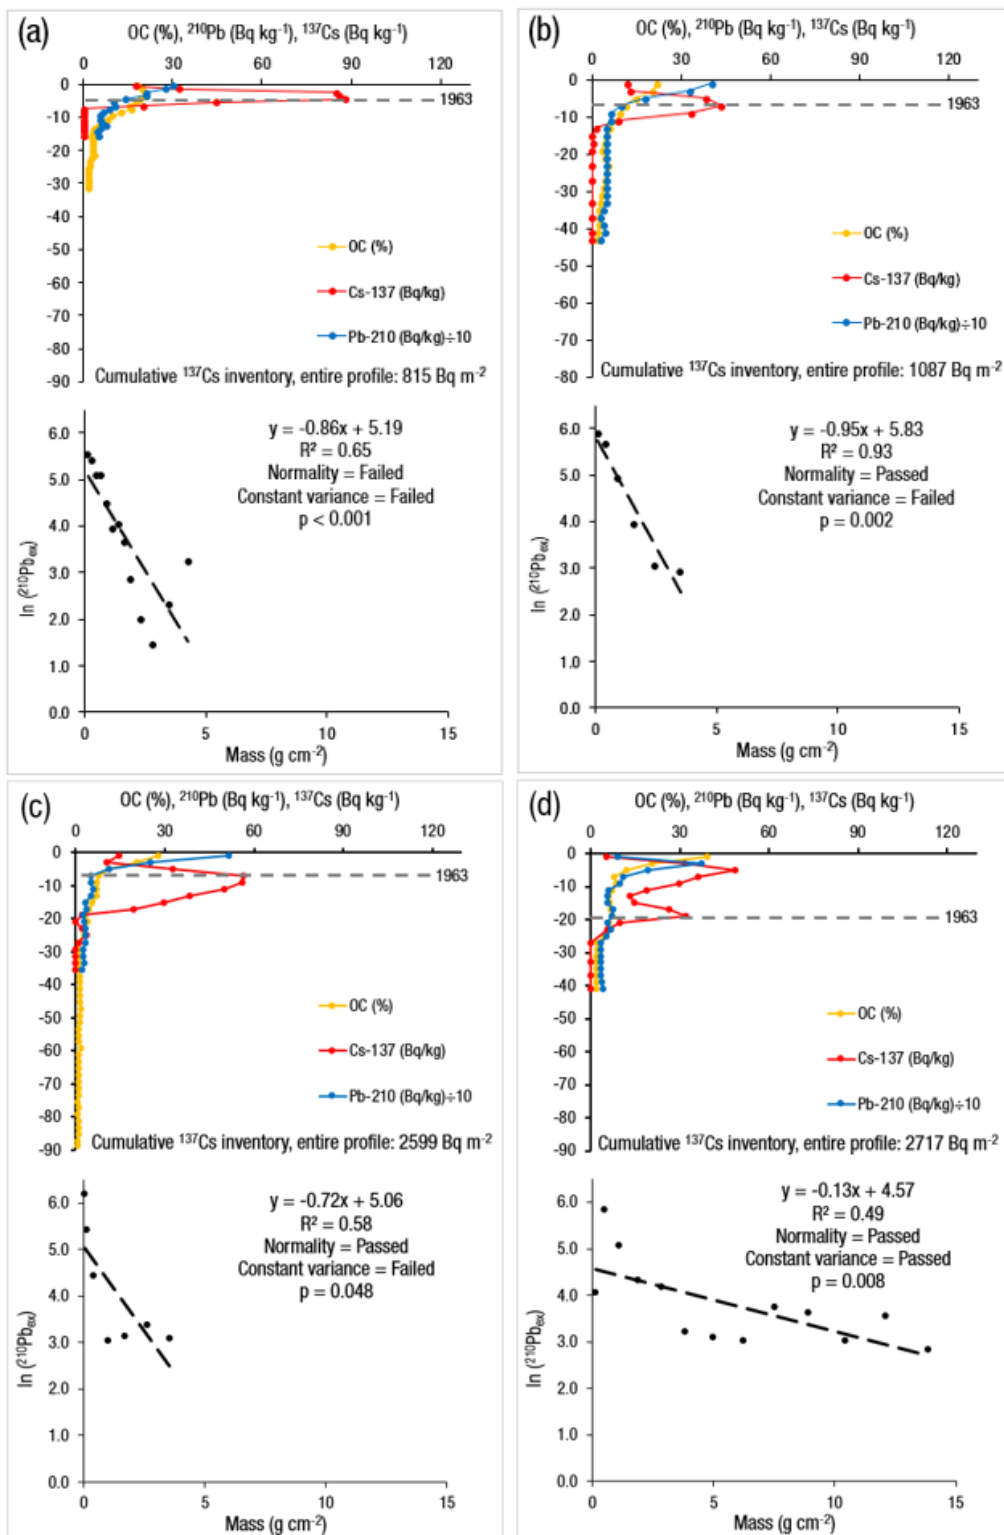

**Supplementary Figure 10:** Depth distributions of high-quality  $^{137}\text{Cs}$  ( $\text{Bq kg}^{-1}$ ) and low-quality  $^{210}\text{Pb}$  ( $\text{Bq kg}^{-1}$ ) profiles (along with the organic carbon [OC] in %) concentrations and linear plot of log-transformed  $^{210}\text{Pb}_{\text{ex}}$  against mass in  $\text{g cm}^{-2}$ ) based on their classification. The four depth distribution plots are from sediment cores (a) SK-B2 T3, (b) MB-3 T2, (c) MB-5 T1, and (d) MB-5 T3.

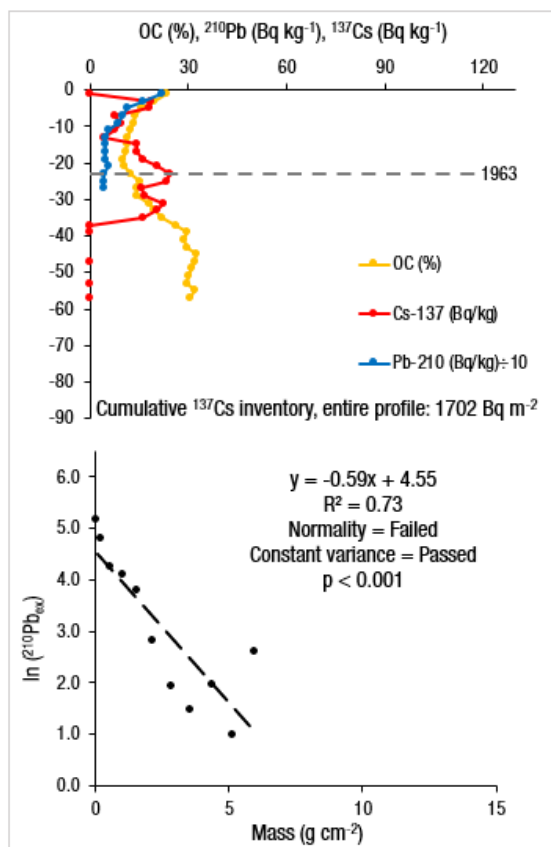

**Supplementary Figure 11:** Depth distributions of high-quality <sup>137</sup>Cs (Bq kg<sup>-1</sup>) and low-quality <sup>210</sup>Pb (Bq kg<sup>-1</sup>) profiles (along with the organic carbon [OC in %] concentrations and linear plot of log-transformed <sup>210</sup>Pb<sub>ex</sub> against mass in g cm<sup>-2</sup>) based on their classification. The depth distribution plot is from sediment core ON-B1 T3.

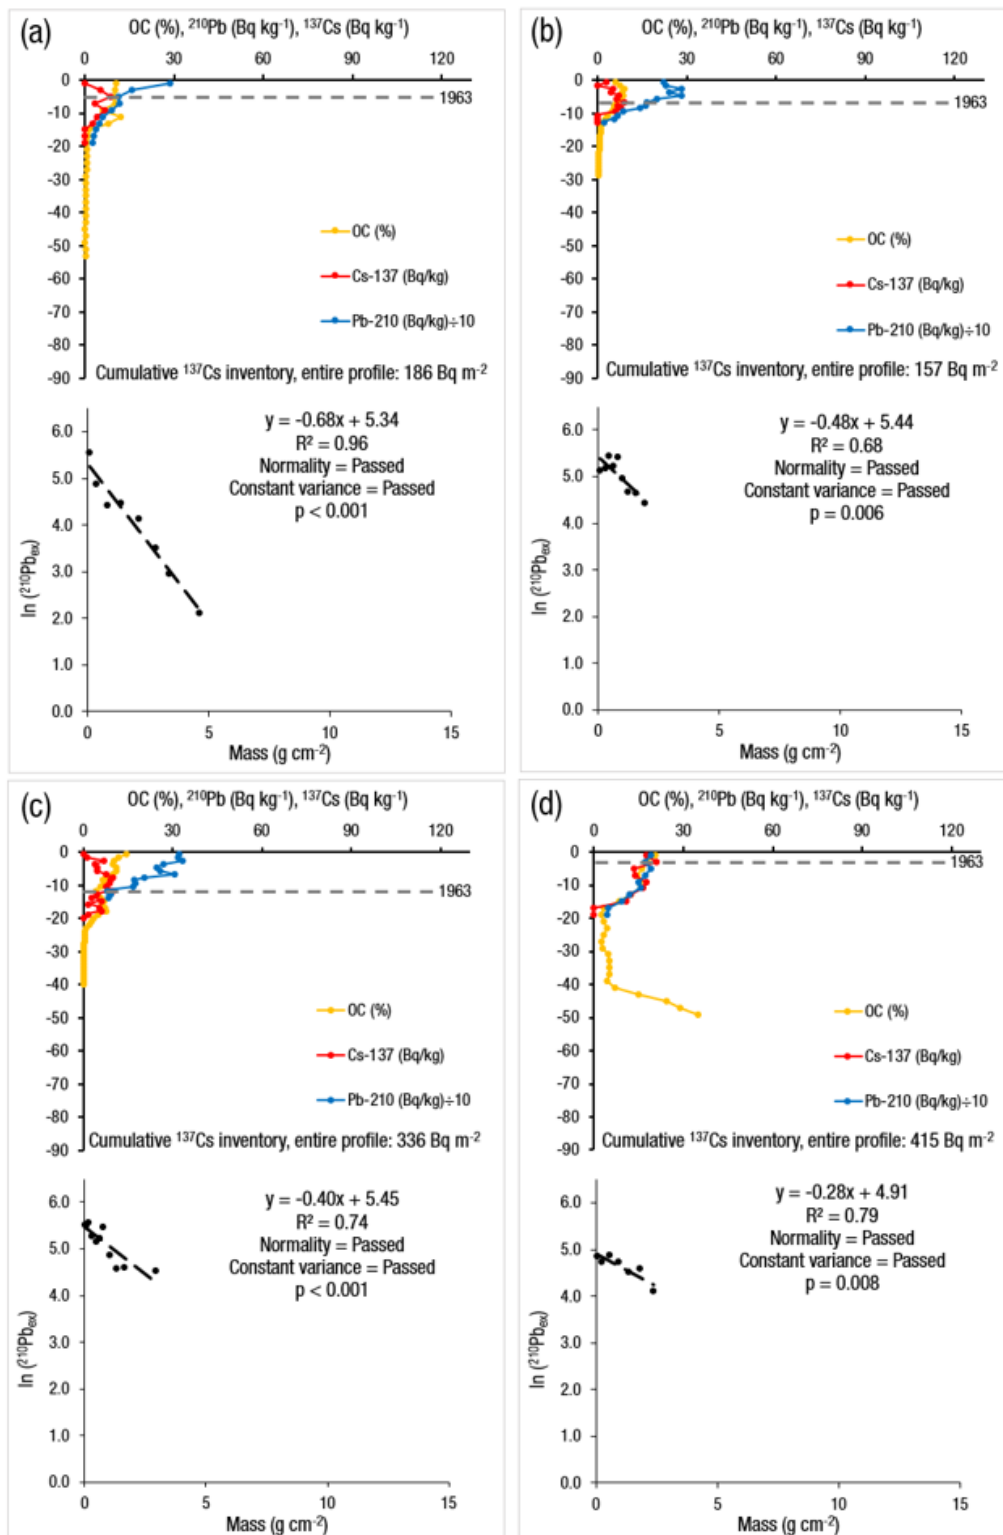

**Supplementary Figure 12:** Depth distributions of low-quality  $^{137}\text{Cs}$  ( $\text{Bq kg}^{-1}$ ) and high-quality  $^{210}\text{Pb}$  ( $\text{Bq kg}^{-1}$ ) profiles (along with the organic carbon [OC in %] concentrations and linear plot of log-transformed  $^{210}\text{Pb}_{\text{ex}}$  against mass in  $\text{g cm}^{-2}$ ) based on their classification. The four depth distribution plots are from sediment cores (a) ON-A2 T2, (b) ON-A2 T3, (c) ON-A2 T3, and (d) ON-B1 T1.

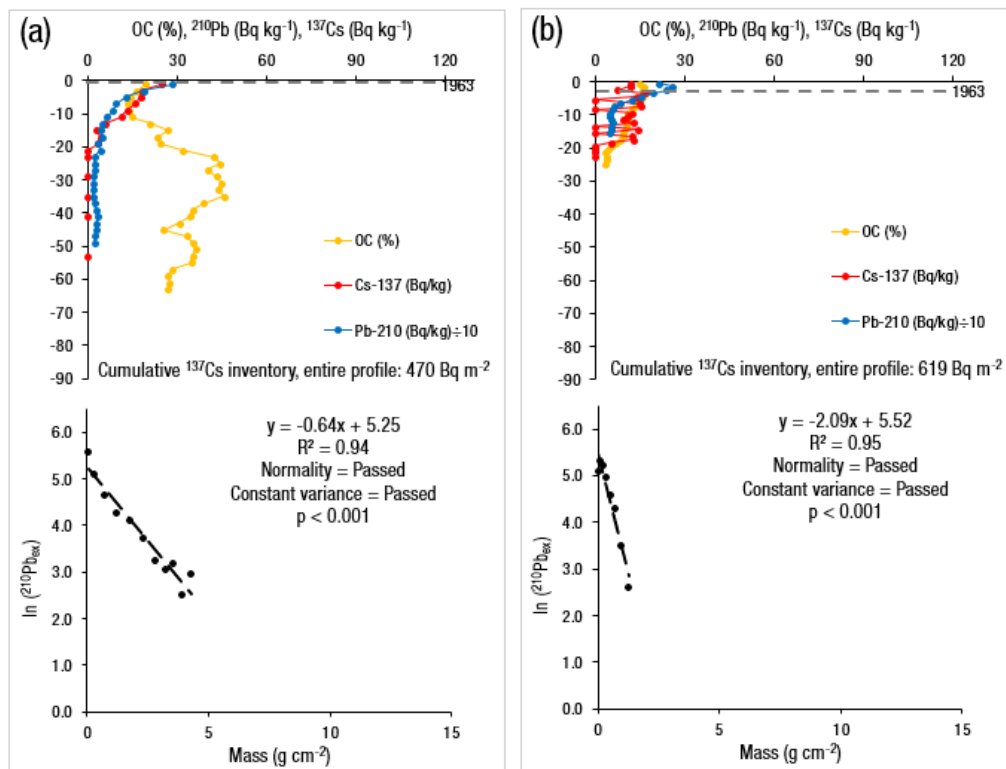

**Supplementary Figure 13:** Depth distributions of low-quality  $^{137}\text{Cs}$  ( $\text{Bq kg}^{-1}$ ) and high-quality  $^{210}\text{Pb}$  ( $\text{Bq kg}^{-1}$ ) profiles (along with the organic carbon [OC in %] concentrations and linear plot of log-transformed  $^{210}\text{Pb}_{\text{ex}}$  against mass in  $\text{g cm}^{-2}$ ) based on their classification. The two depth distribution plots are from sediment cores (a) ON-B1 T2 and (b) ON-B3 T1.
