# Supplementary figures and images for: Technical Note: Comparison of radiometric techniques for estimating recent organic carbon sequestration rates in freshwater mineral soil wetlands
Source: Copernicus journal article supplement (doi:10.5194/egusphere-2024-1162), 2024-05-28

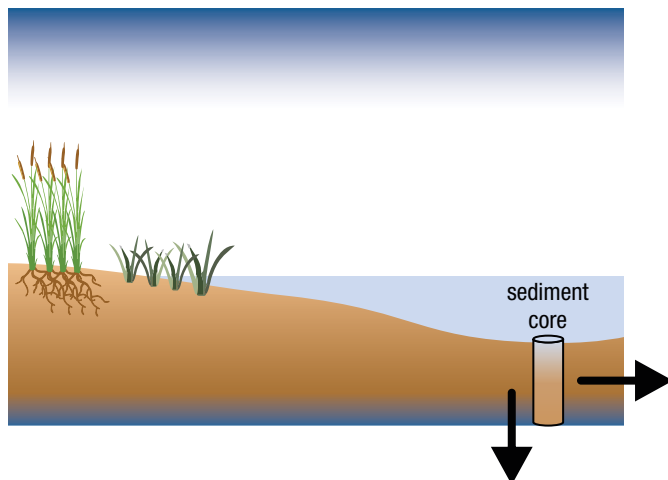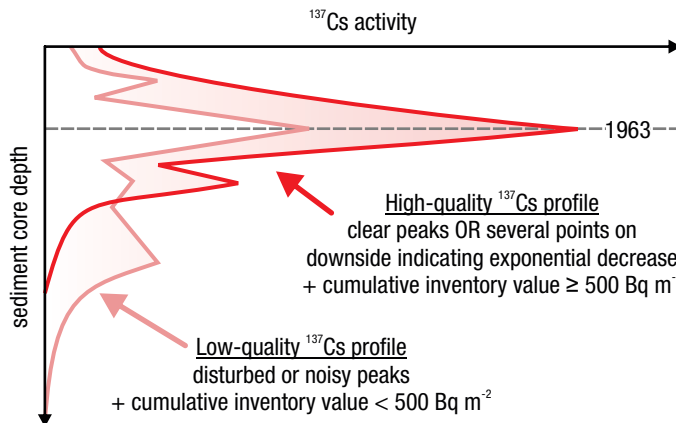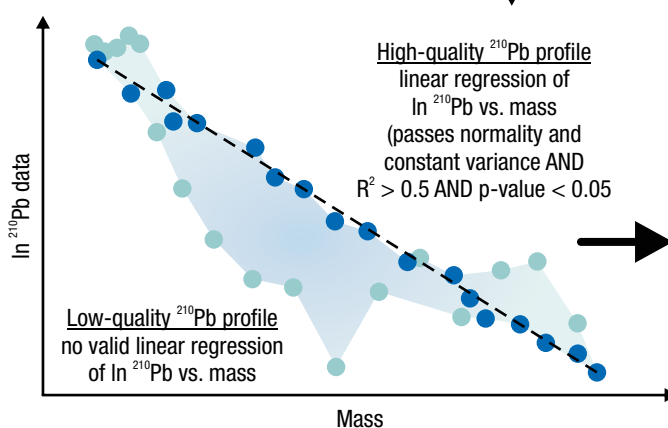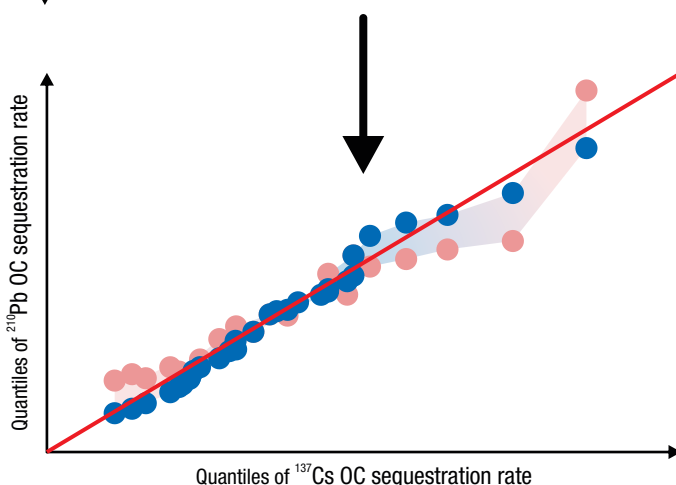

Supplement: Supplementary file 1 [file egusphere-2024-1162-supplement.zip]
